# Supplementary material for: Understory vegetation plays a key role in sustaining soil microbial biomassand extracellular enzyme activities
Source: Copernicus journal article supplement (doi:10.5194/bg-2017-545), 2018-01-16
Supplement: Supplementary file [file bg-2017-545-RC1-supplement.pdf]

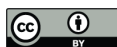

# 1 Understory vegetation plays a key role in sustaining soil microbial biomass and 2 extracellular enzyme activities

3 Yang Yang<sup>1,2</sup>, Xinyu Zhang<sup>2,3,\*</sup>, Jifu Wang<sup>1,\*</sup>, Chuang Zhang<sup>2</sup>, Huimin Wang<sup>2</sup>, Fusheng Chen<sup>4</sup>, Xiaoli Fu<sup>2</sup>, Songze  
4 Wan<sup>2</sup>, Xiaomin Sun<sup>2</sup>, Xuefa Wen<sup>2,3</sup>

5 <sup>1</sup> College of Geographic Science, Harbin Normal University, Harbin 150025, China

6 <sup>2</sup> Key Laboratory of Ecosystem Network Observation and Modeling, Institute of Geographic Sciences and Natural  
7 Resources Research, Chinese Academy of Sciences, Beijing 100101, China

8 <sup>3</sup> College of Resources and Environment, University of Chinese Academy of Sciences, Beijing 100049, China

9 <sup>4</sup> College of Forestry, Jiangxi Agricultural University, Nanchang 330045, China

10 Corresponding author: Xinyu Zhang (zhangxy@igsnr.ac.cn), Jifu Wang (13946004918@163.com)

## 11 Abstract:

12 ~~It is desirable to learn more how~~ understory vegetation affects soil microbial biomass and extracellular enzyme  
13 activities in a subtropical Chinese fir (*Cunninghamia lanceolata*) forests. The aim of this study was to determine the  
14 role of understory vegetation in controlling soil properties, ~~through an examination of the effects of understory~~  
15 ~~vegetation on soil environmental factors,~~ microbial biomass, and extracellular enzyme activities. One paired treatment,  
16 which comprised understory vegetation removal (**None**) and understory vegetation left intact (**Understory**) in the  
17 context of litter removal, was established in a subtropical Chinese fir plantation. We mainly evaluated the effects of  
18 understory vegetation on soil environmental factors, the biomass of bacteria, fungi and actinomycetes, and the activities  
19 of five enzymes, i.e.,  $\alpha$ -1,4-glucosidase,  $\beta$ -1,4-glucosidase ( $\beta$ G),  $\beta$ -1,4-N-acetylglucosaminidase (NAG),  
20  $\beta$ -1,4-xylosidase and acid phosphatase (AP), and two oxidase, i.e., phenol oxidase (PPO) and peroxidase (PER). The  
21 soil moisture content (SMC), and the concentrations of soil dissolved organic carbon (DOC), particulate organic carbon  
22 (POC), soil organic carbon (SOC), ammonia nitrogen ( $\text{NH}_4^+$ -N), and total nitrogen, the POC/SOC ratio declined by  
23 34%, and the biomass of soil bacteria and fungi, total PLFA contents, and the activities of  $\beta$ G, NAG, PPO, and  
24 PER were between 13% and 27% lower, when understory vegetation was removed. The highest activity of AP among  
25 all the measured enzymes may reflect the P was limited in this area, while NAG was positive with the concentration of  
26  $\text{NO}_3^-$ -N, reflected that P- and N- degrading enzyme affected by different mechanism. The positive relationship between  
27 DOC and AP implied that microorganisms absorb carbon to meet their needs for phosphorus. The concentrations of  
28  $\text{NO}_3^-$ -N and  $\text{NH}_4^+$ -N were positively correlated with  $\alpha$ G and  $\beta$ G suggested the increased availability of N promoted  
29 the decomposition of carbon. Understory vegetation removal inhibited the propagation of microorganisms and restricted

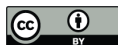

30 their enzyme activities, by reducing soil  and  above-ground nutrient inputs and altering the soil  
31 micro-environment. We therefore propose that, to sustain soil quality in subtropical Chinese fir plantations, understory  
32 vegetation should be maintained.

33 **Keywords:** Chinese fir forest; Enzyme activities; Microbial biomass; Phospholipid fatty acids; Understory vegetation

34

## 35 1. Introduction

36 The interactions between above-ground vegetation functional groups and soil microbial community structures are  
37 thought to be important drivers of C and nutrient cycling in terrestrial ecosystems (Murugan et al., 2014). Understory  
38 vegetation removal influence soil process  reducing above-ground plant diversity Lamb et al., (20  and biomass (Fu  
39 et al., 2015) and changing under-ground  inputs quality (Li et al., 2013) in the forest ecosystem  while understory  
40 vegetation absorbs  and nutrients from the soil (Wang et al., 2014), it also releases C and nutr  to soils  
41 through root exudates, and ~~the~~ turnover of fine roots and leaf litter (Liu et al., 2012). The  effect of understory  
42 vegetation on soil nutrients is therefore the balance between the understory vegetation's nutrient demand and its  
43 capacity to release nutrients to the soil. Soil  cellular enzymes produced by microorganisms or plant roots catalyze  
44 soil C, nitrogen (N), and phosphorus (P) cycling (Stone , 2014), in line with the nutrient requirements of plants and  
45 microorganisms to ensure the nutrient balance is maintained the context of the changes in soil environment (Burns et al.,  
46 2013). To study the changes of enzyme activities with understory vegetation removal could reveal how microbial  
47 nutrient acquisition is affect by microbial biomass and soil nutrients.

48 The influences of understory vegetation on soil properties were closely related to climate, soil type, plant species,  
49 and how long the manipulations have been applied (Li et al., 2013; Nilsson and Wardle, 2005; Zhang et al., 2014).  
50 There is no consensus about how understory vegetation impacts the physical, chemical, and biological properties of  
51 forest soils. Various studies have reported that the litter decomposition rate, soil organic matter (SOM) content, and the  
52  rate decreased when the understory vegetation was removed (Wang et al., 2011; Liu et al., 2012; Wang et al.,  
53 2014), while others reported that its removal had little influence on soil properties (Xiong et al., 2008; Zhao et al., 2011).  
54 The results of understory vegetation on soil microbial biomass also varied. Wu et al., (2011) and Zhao et al., (2013)  
55 found that fungal biomass and the fungi to bacteria ratio (F/B) decreased in the absence of understory vegetation, while  
56 in contrast, Murugan et al., (2014) found that bacterial and saprophytic fungal biomass increased after understory  
57 vegetation was removed from eucalyptus plantations. In an alpine shrubland, the soil arbuscular mycorrhizal fungal  
58 biomass decreased five months after plant functional groups were removed, but this effect disappeared after seventeen  
59 months (Urcelay et al., 2009). ~~The brief review therefore shows that there is inconsistency in the~~ information currently



60 available about the responses of soil enzyme activities to understory vegetation, ~~with some studies~~ reporting that soil  
61 enzyme activities decreased in the subtropical alpine coniferous forest (Huang et al., 2014), ~~and others reporting that~~  
62 ~~they~~ did not change ~~in the~~ *Pinus sylvestris* var. *mongolica* plantation (Lin et al., 2012), when understory vegetation was  
63 removed.

64 The average net ecosystem productivity of Chinese subtropical forests ( $362 \pm 39 \text{ g C m}^{-2} \text{ yr}^{-1}$ ) is approximately  
65 82.6% and 64.9% higher than that of tropical and temperate forests, respectively (Yu et al., 2014). To maintain soil  
66 fertility it is important to ensure that C sinks and forest growth are sustained in these forests. Because of its high  
67 economic value, Chinese fir (*Cunninghamia lanceolata*) plantations are widespread in southern China. They cover an  
68 area of  $9.11 \times 10^6$  ha, and account for approximately 18% of the total plantation area in China (Huang et al., 2013). To  
69 facilitate seed germination, ensure survival of seedlings, avoid the intense competition between understory vegetation  
70 and trees for water, nutrients and light, or for fuel, understory vegetation and litter were commonly removed from the  
71 forest floor in southern China and elsewhere (Xiong et al., 2008; Wu et al., 2011; Liu et al., 2012). As a shallow-rooted  
72 and fast-growing tree species, the Chinese fir competes intensively with understory vegetation for soil nutrients and  
73 moisture (He et al., 2015). ~~We are~~  ~~sure~~ how the soil enzyme activities are affected by the understory vegetation  
74 removal in Chinese fir plantations.

75 In this study, we ~~used~~ a long-term field experiment to assess how understory vegetation ~~in the context of without~~  
76 ~~litter~~ influences  enzyme activities, microbial biomass, and ~~soil environmental factors~~  in Chinese fir plantations.  
77 Earlier studies reported that the nutrient contents release from  term storage pools, such as root exudates, fine root  
78 turnover and leaf litter, decreased when understory vegetation was removed (Liu et al., 2012). We  ~~therefore~~  
79 hypothesized that soil C and nutrient availability, microbial biomass, and enzyme activities would decline upon removal  
80 of the understory vegetation. ~~Furthermore, we expected that our study would highlight~~ the interactions between ~~the~~  
81 ~~microbial biomass, enzyme activities, and soil environmental~~ factors under different forest-understory management  
82 practices.

83

## 84 2. Material and Methods

### 85 2.1 Experimental treatments

86 The study site was located at the Shixi forest plantation in Taihe County, Jiangxi Province, China ( $115^{\circ}03'29.9''$  E,  
87  $26^{\circ}44'29.1''$  N). The plantation experiences a subtropical monsoon climate with a mean annual temperature and  
88 precipitation of  $18.8^{\circ} \text{ C}$  and 1340 mm, respectively. The main soil type in this area is red  which forms from red  
89 sandstone and sandy conglomerate and is classified as Ud 

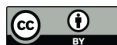

90 The study site is a second-generation Chinese fir plantation that was planted in 1998. The understory vegetation,  
91 including shrubs and herbs, is dominated by Old World forked fern (*Dicranopteris dichotoma* Berth), gambir (*Uncaria*),  
92 oriental blueberry (*Vaccinium bracteatum*), Nutgall Tree (*Rhus chinensis*), Chinese witch hazel (*Loropetalum chinense*),  
93 short shank robe oak (*Quercus glandulifera* Bl.), root of mayflower glorybower (*Clerodendron cyrtophyllum* Turcz),  
94 and andazalea (*Rhododendron*).

95 Three 30 × 30 m plots, with a buffer zone between them exceeding 10 m, were established in the Chinese fir  
plantation in January 2013. One paired treatment with three replications was established within three plots. Each  
97 plot was divided into four 15 × 15 m subplots and contained two treatments, the same treatment were distributed across  
98 each plot to avoid the effects of slope (Fig. 1). The two subplots with the same treatment in one plot were averaged as  
99 one analysis replication. The treatments comprised understory vegetation and litter removal (**None**) and understory  
100 vegetation left intact but litter removal (**Understory**). The litter and understory were managed on a monthly basis. For  
101 the **None** treatment, we removed all litter and understory vegetation from the plot. For the **Understory** treatment, we  
102 removed the litter from the plot, but left the understory vegetation intact. The amount of litter was about 1020 kg hm<sup>-2</sup>  
103 year<sup>-1</sup>, and the amount of understory vegetation in the research site was about 6236 kg hm<sup>-2</sup> under natural conditions.

104

## 105 2.2 Soil sampling and analysis

106 Soil samples were collected in April, July, and November 2015. Five soil cores with an inner diameter of 5 cm  
107 were collected randomly from a depth of 0–10 cm in each subplot and then mixed as one composite sample. All fresh  
108 soil samples were sieved through a 2-mm mesh, stored at 4 °C, and analyzed as early as possible.

109 Soil physical and chemical properties were determined as outlined by Bao (2008). Soil temperature (ST) was  
110 determined at a depth of 10 cm with a soil thermometer (TP101). The soil moisture content (SMC) was measured by  
111 drying at 105 °C to constant weight. Soil pH was measured at a soil to water ratio of 1: 2.5 by a pH digital meter. Soil  
112 nitrate N (NO<sub>3</sub><sup>-</sup>-N) and ammonia N (NH<sub>4</sub><sup>+</sup>-N) concentrations were measured with a continuous flow analyzer (Bran  
113 Luebbe, AA3) after extraction with 2 M KCl solution (soil: solution ratio of 1: 10). Dissolved organic carbon (DOC)  
114 concentrations were measured with a TOC analyzer (Elementar, Liquid II) after extraction with ultra-pure water (soil:  
115 solution ratio of 1: 5) (Jones and Willett., 2006). Particulate organic carbon (POC) was determined as outlined in the  
116 method of Garten et al., (1999). Soil organic C (SOC) and total nitrogen (TN) concentrations were measured with an  
117 elemental analyzer (Vario Max CN).

118 Soil phospholipid fatty acids (PLFAs) were extracted following the procedure outlined by Bossio and Scow (1998),  
119 and were determined with a gas chromatograph (Agilent 6890N). Total soil microbial biomass was represented by

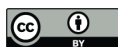

120 the following PLFA biomarkers: gram positive bacteria ( $G^+$ : i14:0, i15:0, a15:0, i16:0, i17:0, a17:0), gram negative  
121 bacteria ( $G^-$ : 16:1 $\omega$ 7c, cy17:0, 18:1 $\omega$ 7c, cy19:0), fungi (16:1 $\omega$ 5, 18:1 $\omega$ 9c, 18:2 $\omega$ 6c, 18:2 $\omega$ 9c 18:3 $\omega$ 6c), actinomycetes  
122 (10Me16:0, 10Me17:0, 10Me18:0);  $G^+$  and  $G^-$  bacterial biomass represented total bacterial biomass (Bradley et al.,  
123 2007; Deneff et al., 2009).

 Soil enzyme activities were measured following the methods of Saiya-Cork et al., (2002). The specific substrates  
125 and functions of the enzymes assayed are listed in Table A1. Five hydrolase activities were assayed using  
126 fluorogenically-labeled substrates. Briefly, a soil suspension was prepared by adding 1 g of fresh soil to 125 mL of 50  
127 mM acetate buffer. We added 200  $\mu$ L of the soil suspension and 50  $\mu$ L of the substrate solution (200  $\mu$ M) to 96  
128 microplates. The microplates were incubated in the dark at 20  $^{\circ}$ C for up to 4 h, following which fluorescence was  
129 measured using a microplate fluorometer (SynergyH4, BioTek) with excitation and emission filters of 365 nm and 450  
130 nm, respectively. 

131 The soil oxidase activities (polyphenol oxidase (PPO) and peroxidase (PER)) were assayed with  
132 spectrophotometrically. We added 600  $\mu$ L of the soil suspension and 150  $\mu$ L of the substrate solution to deep-well plates.  
133 We also added 30  $\mu$ L of 0.3%  $H_2O_2$  solution before determining PER. After incubation in the dark at 20  $^{\circ}$ C for up to 5 h,  
134 the deep-well plates were centrifuged for 3 minutes at 3000  $r\ h^{-1}$ . We then moved 250  $\mu$ L of the supernatant to the  
135 microplates and measured the absorbance at 400 nm with a microplate fluorometer. We had eight replicate sample wells  
136 for each assay.

137

### 138 2.3 Statistical Analysis

139 The differences of soil environmental factors, microbial biomass and enzyme activities between the understory  
140 treatments were assessed by a paired sample *t*-test using SPSS 17.0. Data from the two subplots with the same  
141 treatment in one plot were averaged and then were analyzed statistically ( $n=3$ ). We investigated the relationships among  
142 soil environmental factors and different microbial biomass, and soil enzyme activities using redundancy analysis (RDA,  
143 CANOCO, version 4.5) and Pearson correlation analysis (SPSS 17.0). Monte Carlo Permutation Test was used to test  
144 the significance of the variables before conducted RDA. Figures were generated with SigmaPlot (Version 10.0). The  
145 significance level was  $P < 0.05$ .

146

## 147 3. Results

### 148 3.1 Soil environmental factors

149 Soil C and N concentrations and the SMC were decreased, when understory vegetation was removed (Table 1).



150 The concentrations of various soil C (including DOC, POC, and SOC) and N (including  $\text{NH}_4^+$ -N and TN) fractions,  
151 SMC and POC/SOC ratio were between 4% and 34% lower in the **None** treatment than in the **Understory** treatment ( $P$   
152  $< 0.05$ ). The concentrations of  $\text{NO}_3^-$ -N, ST, pH, and SOC/TN did not differ significantly between the **None** and the  
153 **Understory** treatment ( $P > 0.05$ ).

154

## 155 3.2 Soil microbial biomass

156 Soil total PLFA contents were 27% lower in the **None** treatment than in the **Understory** treatment (Fig. 2). In  
157 specific, bacterial biomass was 26% less in **None** treatment than in the **Understory** treatment ( $P < 0.05$ ), though the  
158 biomass of  $G^+$  and  $G^-$  did not vary ( $P > 0.05$ ). Soil fungal biomass was 20% lower in the **None** treatment than in the  
159 **Understory** treatment ( $P < 0.05$ ). Understory vegetation removal did not change the actinomycetes biomass ( $P > 0.05$ ).

160

## 161 3.3 Soil enzyme activities

162 Some of the soil C- and N- hydrolase and oxidase activities were higher in the treatments with understory  
163 vegetation than in the treatment without understory vegetation (Fig. 3). The activities of  $\beta\text{G}$ , NAG, PPO, and PER were  
164 declined when the understory vegetation was removed, and, for example, were between 13% and 24% lower than those  
165 in the **Understory** treatment ( $P < 0.05$ ). While phosphate hydrolase activities in the **Understory** treatment were the  
166 same as in the **None** treatments ( $P > 0.05$ ).

167

## 168 3.4 Correlations between soil enzyme activities, soil microbial biomass, and soil environmental factors

169 The relationships between different microbial biomass and soil environmental factors are shown in Fig. 4 (a). The  
170 first (RD1) ordination axis explained 62.0% of the total variability in the PLFA data and was mainly correlated with ST,  
171 SMC,  $\text{NO}_3^-$ -N,  $\text{NH}_4^+$ -N, DOC, SOC and SOC/TN, and the second (RD2) ordination axis explained 15.5% of the total  
172 variability in the PLFA data. The ST was positively correlated with  $G^+$ , actinomycetes, total PLFAs,  $G^+/G^-$  and F/B. The  
173 SMC was negatively correlated with actinomycetes and  $G^+/G^-$ . The concentration of  $\text{NO}_3^-$ -N was positively correlated  
174 with  $G^+$ , bacteria, actinomycetes, total PLFAs, and  $G^+/G^-$ . The concentrations of  $\text{NH}_4^+$ -N and DOC were positively  
175 correlated with bacteria, actinomycetes and total PLFAs. The concentration of SOC was positively correlated with  $G^-$ ,  
176 bacteria, fungi and total PLFAs. ( $P < 0.05$ ) (Table A2).

177 The relationships between soil enzyme activities and soil environmental factors are shown in Fig. 4 (b). The RD1  
178 and the second (RD2) ordination axes explained 50.1% and 19.9% of the total variability in the enzyme activities,  
179 respectively. The concentrations of DOC,  $\text{NO}_3^-$ -N,  $\text{NH}_4^+$ -N were mainly related to RD2 ordination axis. The



180 concentration of DOC was positively correlated with  $\alpha$ G, and was negatively correlated with  $\beta$ X and AP. The  
181 concentration of  $\text{NO}_3^-$ -N was positively correlated with  $\alpha$ G,  $\beta$ G, NAG, PPO and PER. The concentration of  $\text{NH}_4^+$ -N was  
182 positively correlated with  $\alpha$ G and  $\beta$ G ( $P < 0.05$ ; Table A2). Pearson correlation analysis demonstrated that bacteria and  
183 total PLFAs were positively correlated with  $\alpha$ G,  $\beta$ G, NAG, PPO and PER. The biomass of fungi was positively  
184 correlated with  $\alpha$ G,  $\beta$ G, NAG. The biomass of actinomycetes was positively correlated with  $\alpha$ G,  $\beta$ G and PER. The ratio  
185 of  $G^+/G^-$  was positively correlated with all the enzymes except  $\alpha$ G (Table A3).

186

#### 187 4. Discussion

188 Consistent with our hypothesis, the concentrations of soil C (including DOC, POC, and SOC) and N (including  
189  $\text{NH}_4^+$ -N and TN) were decreased when the understory vegetation was removed (Table 1), which demonstrated that  
190 understory vegetation is beneficial to improve the content and availability of soil C and N. Other studies however  
191 reported that the responses of soil physical and chemical properties to understory vegetation removal were minimal  
192 (Xiong et al., 2008; Zhao et al., 2011). The distinct results might largely depend on the variety of understory vegetation  
193 species in different studies (Nilsson and Wardle, 2005) and the influence of litter. In our study, we removed litter in all  
194 treatments to avoid the effects of litter. Studies in the past have shown that a source of soil C and nutrients, such as  
195 rhizosphere secretions, fine root turnover (Liu et al., 2012) and the SOM decomposition rate (Wu et al., 2011; Liu et al.,  
196 2012; Zhao et al., 2013), decline when the understory vegetation is removed. Although Chinese fir roots may occupy  
197 the space vacated and may partly compensate for the reduced C inputs by increasing their exudation (Li et al., 2016),  
198 and understory vegetation root residue also incorporated into soil (Li et al., 2013) after understory vegetation removal.  
199 The increased quantities of soil C and N added by Chinese fir roots and originated from the root residue of understory  
200 vegetation in this study did not fully compensate for the C and N lost when understory vegetation was removed.  
201 Additionally, soil nutrients tend to be higher when plant functional diversity is high (Zhou et al., 2016). Therefore, soil  
202 C and N concentrations may decrease by removing understory vegetation and reducing plant diversity. The decreased  
203 values of the POC/SOC ratio (Table 1) suggest that POC changed more than SOC when understory vegetation was  
204 removed. The change in the POC concentrations indicated that understory vegetation intact improved soil  
205 sustainability and productivity in Chinese fir forests, since aggregate stability and POC concentrations were related  
206 (Bouajila and Gallali, 2010). In addition, the decrease in the SMC when the understory vegetation was removed (Table  
207 1) reflects the enhanced soil evaporation driven by the increase in soil surface solar radiation (Wang et al., 2014).

208 Consistent with our hypothesis, the microbial biomass, including total PLFAs, bacterial, and fungal PLFA  
209 biomarkers, declined after the understory vegetation was removed in this study (Fig. 2). Previous studies also reported



210 decreases in fungal biomass after understory vegetation removal (Wu et al., 2011; Liu et al., 2012; Zhao et al., 2013),  
211 and changes in the structure of the soil microbial community in response to the loss of above-ground plant functional  
212 groups (Murugan et al., 2014). ~~In our study~~, the decline in fungal biomass may reflect the decrease in plant diversity.  
213 Some soil fungi, such as AMF, are controlled by plants, and specific AMF may only grow when specific plants are  
214 present (Hart et al., 2001). If plant communities change over time, their mycorrhizal partners will also change (Hart et  
215 al., 2001). Mycorrhizal species in the study area included understory vegetation, such as *Dicranopteris dichotoma*,  
216 *Vaccinium bracteatum*, *Loropetalum chinense*, and *Rhododendron*. Chinese fir monocultures may support fewer fungi  
217 biomass than other plantations where the understory vegetation is left intact. Fungal biomass and SOC concentration  
218 were positively correlated (Table A2). Therefore, when the amounts of C and exuded by the rhizosphere decreased after  
219 the understory vegetation was removed, the soil fungal biomass also decreased, since soil fungi dominated  
220 decomposition of C in the rhizosphere (Denef et al., 2009). The bacterial biomass also decreased after the understory  
221 vegetation was removed, which was mainly the result of reductions in the soil C and N concentrations (Table A2) and  
222 plant diversity (Lamb et al., 2011). The C:N ratio did not change because the bacterial and fungal biomass decreased at  
223 the same time (Fig. 2). Brant et al., (2006) considered that there might be an increase in the biomass of actinomycetes to  
224 decompose recalcitrant C compounds when nutrient availabilities were low; however, we did not observe this pattern in  
225 our research (Fig. 2), perhaps because of the high variability in the actinomycetes biomass in the field plots. Our results  
226 suggest that bacterial and fungal biomass were better indicators of the changes in understory management practices in  
227 the Chinese fir plantation (arbuscular mycorrhizal species) than actinomycetes.

228 Consistent with our hypothesis, we found a lower extracellular enzyme activity when understory vegetation was  
229 removed (Fig. 3), which was agree with the results of Huang et al., (2014), who found soil cellulose activity decline  
230 after understory vegetation removal, in spite of Lin et al., (2012) didn't find any changes in soil enzyme activities. The  
231 soil rhizosphere has been described as soil microbial hotspots with higher microbial activities than other areas of the  
232 soil profile (Kuzyakov and Blagodatskaya, 2015). Decreases in the quantity and diversity of root exudates in the  
233 understory vegetation, and changes in the soil environmental factors and soil fauna, may cause direct and indirect  
234 changes in soil enzyme activities (Liu et al., 2012; Huang et al., 2014). There are several possible reasons for the  
235 decreased enzyme activities observed in our study, as follows. (1) When understory vegetation is removed, less organic  
236 matters are released to the soil from the lower amounts of root (Liu et al., 2012), which means there will be less  
237 substrates available for enzyme production. (2) Mycorrhizal fungi and rhizosphere microorganisms attached to tree  
238 roots vanish when understory vegetation is removed (Fekete et al., 2011), which means there are fewer microorganisms  
239 to produce less enzymes. (3) For the understory vegetation remaining and removal treatment, continuous root exudates





240 and discontinuous root residue were incorporated into the soil, respectively (Li et al., 2013). The different chemical  
241 composition of SOM sources may have different influence on enzyme activities.

242 We observed positive relationships between the activities of  $\alpha$ G,  $\beta$ G and the concentrations of soil inorganic N  
243 fractions (Table A2), which reflected that the decreased availability of N reduced the decomposition of C when  
244 understory vegetation was removed. The size of soil C pool is the balance between the inputs and outputs of C (De  
245 Deyn et al., 2008). When understory vegetation is removed, both the soil C inputs, including root exudates, fine root  
246 turnover (Liu et al., 2012), and SOM decomposition rate (Wu et al., 2011; Liu et al., 2012; Zhao et al., 2013), and soil C  
247 outputs, such as soil respiration (Wang et al., 2013), decrease. The decreased concentrations of SOC and TN caused by  
248 understory vegetation removal therefore indicate that the removal of understory vegetation had more effect on the  
249 outputs than inputs of soil C and N. Polyphenols are mainly decomposed by PPO, so the decrease in PPO activity may  
250 result in an increase in the content of polyphenols that have toxic effects on soil microbes and inhibit hydrolase  
251 activities (Sinsabaugh, 2010). Of all the enzymes we assayed, the activity of AP was the highest (Fig. 3), perhaps  
252 because P was the most limiting nutrient in this acidic Chinese fir forest soil. The mineralization of organic phosphorus  
253 might increase as the microorganisms produce more phosphatase to ensure their demand for P when P is limited  
254 (Allison and Vitousek, 2005). The results of Loepmann et al., (2016) suggest that the same mechanism applies to N  
255 demand in the rhizosphere, as they found that N-degrading enzymes increased when N was limited in the rhizosphere of  
256 maize-planted soil. However, we did not find evidence that N demand is controlled by such a mechanism in this paper.  
257 The ratio of SOC/TN did not change, which indicates that the rhizosphere of the understory vegetation was not  
258 N-limited relative to understory vegetation removal. The positive correlation between NAG activity and  $\text{NO}_3^-$ -N  
259 concentrations in our study (Table A2) may suggest that more  $\text{SO}_4^{2-}$  derived from root enhanced NAG activity may in  
260 turns promote the mineralization of SOM, thereby increased soil available N concentrations. Chitin, a major structural  
261 component of fungal cell wall, can be degraded by NAG (Mganga et al., 2015). We also found that there was a  
262 significant positive correlation between NAG and fungus biomass (Table A3). The activity of NAG was lower when the  
263 understory vegetation was removed than the understory vegetation intact, which might reflect a reduction in fungal  
264 biomass. We did not observe any change in AP activities when the understory vegetation was removed, perhaps because  
265 Chinese firs, along with their mycorrhizal associates, are the main producers of these enzymes. The negative  
266 relationship between the activity of AP and the concentration of DOC indicated that microorganisms absorbed more C  
267 to meet the demands for P in the P limited area.

268



## 269 5. Conclusions

270 Our results demonstrate that understory vegetation plays an important role in enhancing soil C- and N- hydrolase  
271 and oxidase activities, through increasing soil C and N concentrations, and bacterial and fungal biomass. Understory  
272 vegetation, however, does not influence the biomass of actinomycetes or P-hydrolase activity. **The activity of AP among  
273 all the measured enzymes is the highest may reflect the P was limited in this area, while NAG was positive with the  
274 concentration of NO<sub>3</sub>-N, reflected that P- and N- degrading enzyme affected by different mechanism.** The positive  
275 relationships between the activities of C-degrading enzymes and the concentrations of soil inorganic N implied that the  
276 decreased availability of N inhibited the decomposition of C when understory vegetation was removed. The activity of  
277 AP is positive with the concentration of DOC indicated that microorganisms absorbed more C to meet the demands for  
278 P in the P limited area. From this study, we can conclude that understory vegetation are beneficial for sustaining soil  
279 microbial activities in subtropical Chinese fir forests. We suggest that, as part of routine forestry management,  
280 understory vegetation should not be removed from, but rather should be maintained in, subtropical Chinese fir  
281 plantations.

282

## 283 Acknowledgements

284 This work was jointly financed by the National Natural Science Foundation of China (Nos. 41571130043, 41571251).

285

## 286 References

- 287 Allison, S.D., Vitousek, P.M.: Responses of extracellular enzymes to simple and complex nutrient inputs, *Soil Biol.*  
288 *Biochem.*, 37, 937-944, 2005.
- 289 Bao, S.D.: *Soil and Agricultural Chemistry Analysis*, third ed, Agricultural Press, Beijing, 2008. (in Chinese).
- 290 Bradley, K., Hancock, J.E., Giardina, C.P., Pregitzer, K.S.: Soil microbial community responses to altered lignin  
291 biosynthesis in *Populus tremuloides* vary among three distinct soils, *Plant Soil*, 294, 185-201, 2007.
- 292 Brant, J.B., Myrold, D.D., Sulzman, E.W.: Root controls on soil microbial community structure in forest soils,  
293 *Oecologia*, 148, 650-659, 2006.
- 294 Bossio, D.A., Scow, K.M.: Impacts of carbon and flooding on soil microbial communities: Phospholipid fatty acid  
295 profiles and substrate utilization patterns, *Microb. Ecol.*, 35, 265-278, 1998.
- 296 Bouajila, A., Gallali, T.: Land use effect on soil and particulate organic carbon, and aggregate stability in some soils in  
297 Tunisia, *Afr. J. Agric. Res.*, 5, 764-77, 2010.
- 298 Burns, R.G., DeForest, J.L., Marxsen, J., Sinsabaugh, R.L., Stromberg, M.E., Wallenstein, M.D., Weintraub,

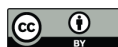

- 299 M.N., Zoppini, A.: Soil enzymes in a changing environment: current knowledge and future directions, *Soil Biol.*  
300 *Biochem.*, 58, 216-234, 2013.
- 301 De Deyn, G.B., Cornelissen, J.H.C., Bardgett, R.D.: Plant functional traits and soil carbon sequestration in contrasting  
302 biomes, *Ecol. Lett.*, 11, 516-531, 2008.
- 303 Deneff, K., Roobroeck, D., Wadu, M.C.W.M., Lootens, P., Boeckx, P.: Microbial community composition and  
304 rhizodeposit-carbon assimilation in differently managed temperate grassland soils, *Soil Biol. Biochem.*, 44,  
305 14-153, 2009.
- 306 Fekete, I., Varga, C., Kotroczó Z., Tóth, J.A., Várhíró G.: The relation between various detritus inputs and soil enzyme  
307 activities in a Central European deciduous forest, *Geoderma*, 167, 15-21, 2011.
- 308 Fu, X.L., Yang, F.T., Wang, J.L., Di, Y.B., Dai, X.Q., Zhang, X.Y., Wang, H.M.: Understory vegetation leads to changes  
309 in soil acidity and in microbial communities 27 years after reforestation, *Sci. Total Environ.*, 502, 280-286, 2015.
- 310 Garten, C.T., Post, W.M., Hanson, P.J., Cooper, L.W.: Forest soil carbon inventories and dynamics along an elevation  
311 gradient in the southern Appalachian Mountains, *Biogeochemistry*, 42, 115-145, 1999.
- 312 Hart, M.M., Reader, R.J., Klironomos, J.N.: Life-history strategies of arbuscular mycorrhizal fungi in relation to their  
313 successional dynamics, *Mycologia*, 93, 1186-1194, 2001.
- 314 He, T.X., Li, Y.P., Zhang, F.Y., Wang, Q.K.: Effects of understory removal on soil respiration and microbial community  
315 composition structure in a Chinese fir plantation, *Chin. J. Plant Ecol.*, 39, 797-806, 2015. (in Chinese).
- 316 Huang, Y.M., Yang, W.Q., Zhang, J., Lu, C.T., Liu, X., Wang, W., Guo, W., Zhang, D.J.: Response of soil  
317 microorganism and soil enzyme activity to understory plant removal in the subalpine coniferous plantation of  
318 western Sichuan, *Acta Ecol. Sin.*, 34, 4183-4192, 2014. (in Chinese).
- 319 Huang, Z.Q., He, Z.M., Wan, X.H., Hu, Z.H., Fan, S.H., Yang, Y.S.: Harvest residue management effects on tree growth  
320 and ecosystem carbon in a Chinese fir plantation in subtropical China, *Plant Soil*, 364, 303-314, 2013.
- 321 Jones, D.L., Willett, V.B.: Experimental evaluation of methods to quantify dissolved organic nitrogen (DON) and  
322 dissolved organic carbon (DOC) in soil, *Soil Biol. Biochem.*, 38, 991-999, 2006.
- 323 Kuzyakov, Y., Blagodatskaya, E.: Microbial hotspots and hot moments in soil: Concept & review, *Soil Biol. and*  
324 *Biochem.*, 83,184-199, 2015.
- 325 Lamb, E.G., Kennedy, N., Siciliano, S.D.: Effects of plant species richness and evenness on soil microbial community  
326 diversity and function, *Plant Soil*, 338, 483-495, 2011.
- 327 Li, M.H., Du, Z., Pan, H.L., Yan, C.F., Xiao, W.F., Lei, J.P: Effects of neighboring woody plants on target trees with  
328 emphasis on effects of understory shrubs on overstory physiology in forest communities: a mini-review, *Commun.*



- 329 Ecol., 13, 117-128, 2016.
- 330 Li, Y. F., Zhang, J.J., Chang, S.X., Jiang, P.K., Zhou, G.M., Fu, S.L., Yan, E.R., Wu, J.S., Lin, L.: Long-term intensive  
331 management effects on soil organic carbon pools and chemical composition in Moso bamboo (*Phyllostachys*  
332 *pubescens*) forests in subtropical China, *For. Ecol. Manage.*, 303, 121-130, 2013.
- 333 Lin G.G., Zhao, Q., Zhao, L., Li, H.C., Zeng, D.H.: Effects of understory removal and nitrogen addition on the soil  
334 chemical and biological properties of *Pinus sylvestris* var. *mongolica* plantation in Keerqin Sandy Land, *Chin. J.*  
335 *Appl. Ecol.*, 23, 1188-1194, 2012. (in Chinese).
- 336 Liu, Z.F., Wu, J.P., Zhou, L.X., Lin, Y.B., Fu, S.L.: Effect of understory fern (*Dicranopteris dichotoma*) removal on  
337 substrate utilization patterns of culturable soil bacterial communities in subtropical Eucalyptus plantations,  
338 *Pedobiologia*, 55, 7-13, 2012.
- 339 Loeppmann, S., Biagodatskaya, E., Pausch, J., Kuzyakov, Y.: Enzyme properties down the soil profile - A matter  
340 of substrate quality in rhizosphere and detritusphere, *Soil Biol. Biochem.*, 103, 274-283, 2016.
- 341 Mganga, K.Z., Razavi, B.S., Kuzyakov, Y.: Microbial and enzymes response to nutrient additions in soils of Mt.  
342 Kilimanjaro region depending on land use, *Eur. J. Soil Biol.*, 69, 33-40, 2015.
- 343 Murugan, R., Beggi, F., Kumar, S.: Belowground carbon allocation by trees, understory vegetation and soil type alter  
344 microbial community composition and nutrient cycling in tropical Eucalyptus plantation, *Soil Biol. Biochem.*, 76,  
345 257-267, 2014.
- 346 Nilsson, M.C., Wardle, D.A.: Understory vegetation as a forest ecosystem driver: evidence from the northern Swedish  
347 boreal forest, *Front. Ecol. Environ.*, 3, 421-428, 2005.
- 348 Saiya-Cork, K.R., Sinsabaugh, R.L., Zak, D.R.: The effects of long term nitrogen deposition on extracellular enzyme  
349 activity in an *Acer saccharum* forest soil, *Soil Biol. and Biochem.*, 34, 1309-1315, 2002.
- 350 Sinsabaugh, R.L.: Phenol oxidase, peroxidase and organic matter dynamics of soil, *Soil Biol. Biochem.*, 24, 391-401,  
351 2010.
- 352 Stone, M.M., DeForest, J.L., Plante, A.F.: Changes in extracellular enzyme activity and microbial community structure  
353 with soil depth at the Luquillo Critical Zone Observatory, *Soil Biol. Biochem.*, 75, 240-241, 2014.
- 354 Urcelay, C., Diaz, S., Gurruch, D.E., Chapin, F.S., Cuevas, E., Dominguez, L.S.: Mycorrhizal community resilience in  
355 response to experimental plant functional type removals in a woody ecosystem, *J. Ecol.*, 97, 1291-1301, 2009.
- 356 Wang, F.M., Zou, B., Li, H.F., Li, Z.A.: The effect of understory removal on microclimate and soil properties in two  
357 subtropical lumber plantations, *J. Forest Res.*, 19, 238-243, 2014.
- 358 Wang, Q.K., He, T.X., Wang, S.L., Liu, L.: Carbon input manipulation affects soil respiration and microbial community



- 359 composition in a subtropical coniferous forest, *Agric. For. Meteorol.*, 178, 152-160, 2013.
- 360 Wang, X.L., Zhao, J., Wu, J.P., Chen, H., Lin, Y.B., Zhou, L.X., Fu, S.L.: Impacts of understory species removal and/or  
361 addition on soil respiration in a mixed forest plantation with native species in southern China, *Forest Ecol.  
362 Manage.*, 261, 1053-1060, 2011.
- 363 Wu, J.P., Liu, Z.F., Wang, X.L., Sun, Y.X., Zhou, L.X., Lin, Y.B., Fu, S.L.: Effects of understory removal and tree  
364 girdling on soil microbial community composition and litter decomposition in two Eucalyptus plantations in South  
365 China, *Func. Ecol.*, 25, 921-931, 2011.
- 366 Xiong, Y.M., Xia, H.P., Li, Z.A., Cai, X.A., Fu, S.L.: Impacts of litter and understory removal on soil properties in a  
367 subtropical *Acacia mangium* plantation in China, *Plant Soil*, 304, 179-188, 2008.
- 368 Yu, G.R., Chen, Z., Piao, S.L., Peng, C.H., Ciais, P., Wang, Q.F., Li, X.R., Zhu, X.J.: High carbon dioxide uptake by  
369 subtropical forest ecosystems in the East Asian monsoon region, *Proc. Natl. Acad. Sci. USA*, 111, 4910-4915,  
370 2014.
- 371 Zhang, J.J., Li, Y.F., Chang, S.X., Jiang, P.K., Zhou, G.M., Liu, J., Wu, J.S., Shen, Z.M.: Understory vegetation  
372 management affected greenhouse gas emissions and labile organic carbon pools in an intensively managed Chinese  
373 chestnut plantation, *Plant Soil*, 376, 363-375, 2014.
- 374 Zhao, J., Wan, S.Z., Fu, S.L., Wang, X.L., Wang, M., Liang, C.F., Chen, Y.Q., Zhu, X.L.: Effects of understory removal  
375 and nitrogen fertilization on soil microbial communities in Eucalyptus plantations, *Forest Ecol. Manage.*, 310,  
376 80-86, 2013.
- 377 Zhao, J., Wang, X.L., Shao, Y.H., Xu, G.L., Fu, S.L.: Effects of vegetation removal on soil properties and decomposer  
378 organisms, *Soil Biol. Biochem.*, 45, 954-960, 2011.
- 379 Zhou, L.L., Cai, L.P., He, Z.M., Wang, R.W., Wu, P.F., Ma, X.Q.: Thinning increases understory diversity and biomass,  
380 and improves soil properties without decreasing growth of Chinese fir in southern China, *Environ. Sci. Pollut. Res.*,  
381 23, 24135-24150, 2016.
- 382

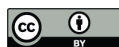

383 **Figure captions**

384 Fig. 1 One paired plot design treatments. Understory vegetation was either cut and removed (**None**) or left intact  
385 (**Understory**) in the context of removing litter.

386 Fig. 2 Soil phospholipid fatty acid (PLFAs) contents of different microbial community compositions  
387 (a) contents of different PLFAs contents, (b) ratio of PLFAs contents. *None* **None**, *U* **Understory**,  $G^+/G^-$  ratio of gram  
388 positive bacteria to gram negative bacteria, F/B ratio of fungi to bacteria. Different lowercases represent significant  
389 differences among the **None** and **Understory** treatments ( $P < 0.05$ ). Data was the average of April, July and November  
390 data. N=18, n=3. The same below

391 Fig. 3 Soil enzyme activities  
392 (a) soil hydrolase activities, (b) soil oxidase activity.  $\alpha G$   $\alpha$ -1,4-glucosidase,  $\beta G$   $\beta$ -1,4-glucosidase, *NAG*  
393  $\beta$ -1,4-N-acetylglucosaminidase,  $\beta X$   $\beta$ -1,4-xylosidase, *AP* acid phosphatase, *PPO* phenol oxidase, *PER* peroxidase.

394 Fig. 4 Redundancy analysis of soil environmental factors and (a) microbial biomass, and (b) enzyme activities  
395 *SMC* soil moisture content, *pH* soil pH,  $NO_3^-$ -*N* soil nitrate nitrogen,  $NH_4^+$ -*N* soil ammonia nitrogen, *TN* soil total  
396 nitrogen, *DOC* soil dissolved organic carbon, *POC* soil particulate organic carbon, *SOC* soil organic carbon, *POC/SOC*  
397 ratio of POC to SOC, *SOC/TN* ratio of SOC to TN

398

399

400

401

402

403

404

405

406

407

408

409

410

411



412 **Table captions**

413 Table 1 Soil environmental factors

414

415

416

417

418

419

420

421

422

423

424

425

426

427

428

429

430

431

432

433

434

435

436

437

438

439



440 **Supplementary material**

441 Table A1 Soil enzymes and their corresponding substrates and functions

442 Table A2 Pearson correlation coefficients between soil environmental factors and different microbial biomass and

443 enzyme activities

444 Table A3 Pearson correlation coefficients between different soil microbial biomass and enzyme activities

445 Table A4 Soil environmental factors in different months

446 Table A5 Soil microbial biomass in different months

447 Table A6 Soil enzyme activities in different months

448

449

450

451

452

453

454

455

456

457

458

459

460

461

462

463

464

465

466

467

468

469



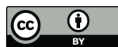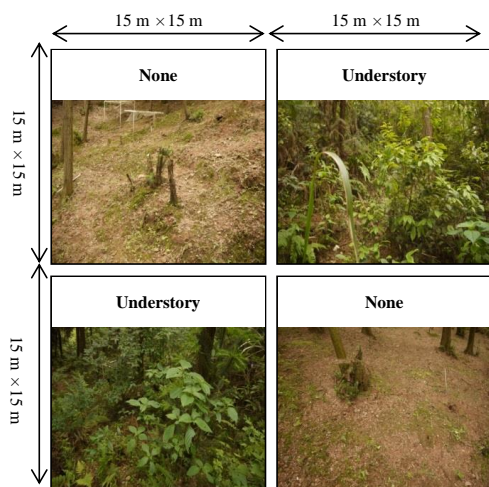

470

471 Fig. 1

472

473

474

475

476

477

478

479

480

481

482

483

484

485

486

487

488

489

490

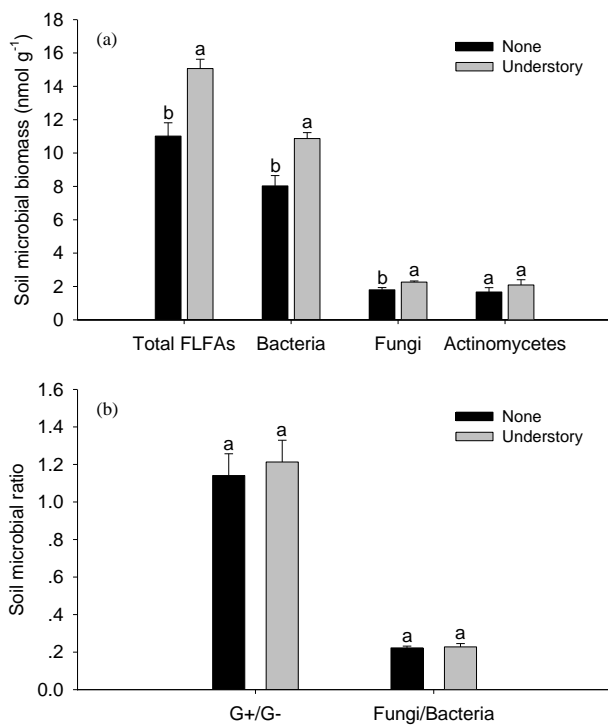

491

492

493 Fig. 2

494

495

496

497

498

499

500

501

502

503

504

505

506

507



508

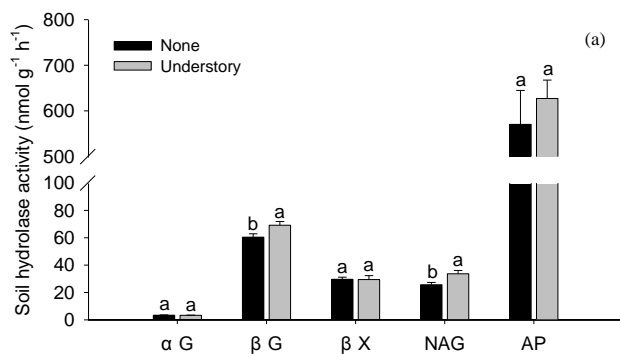

509

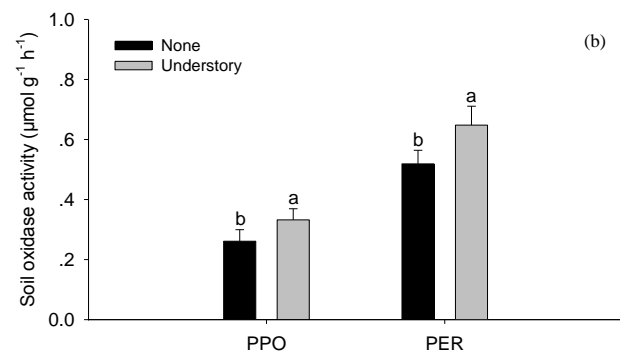

510

Fig. 3

511

512

513

514

515

516

517

518

519

520

521

522

523

524

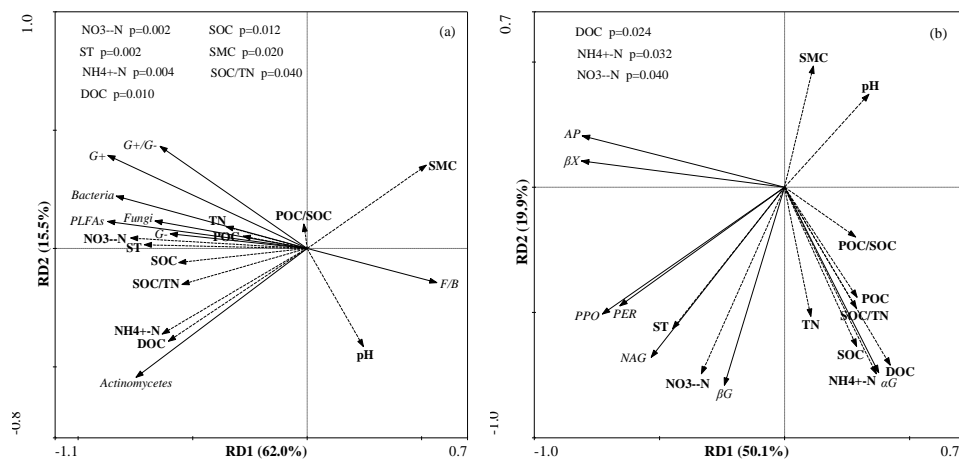

525

526 Fig. 4

527

528

529

530

531

532

533

534

535

536

537

538

539

540

541

542

543

544



545 Table 1 Soil environmental factors

| Treatment         | ST<br>(°C) | SMC<br>(%) | pH       | DOC<br>(mg kg <sup>-1</sup> ) | POC<br>(mg<br>kg <sup>-1</sup> ) | SOC<br>(g kg <sup>-1</sup> ) | NO <sub>3</sub> <sup>-</sup> -N<br>(mg kg <sup>-1</sup> ) | NH <sub>4</sub> <sup>+</sup> -N<br>(mg kg <sup>-1</sup> ) | TN<br>(g kg <sup>-1</sup> ) | POC/SOC<br>(%) | SOC/TN   |
|-------------------|------------|------------|----------|-------------------------------|----------------------------------|------------------------------|-----------------------------------------------------------|-----------------------------------------------------------|-----------------------------|----------------|----------|
| <b>None</b>       | 21.1±1.8   | 21.92±0.   | 4.88±0.0 | 37.3±3.4                      | 3.7±0.3                          | 17.6±0.8                     | 4.84±0.6                                                  | 14.72±2.                                                  | 1.19±0.0                    | 20.6±1.0b      | 14.9±0.4 |
|                   | a          | 9b         | 3a       | b                             | b                                | b                            | a                                                         | 5b                                                        | 4b                          |                | a        |
| <b>Understory</b> | 21.0±1.7   | 22.92±1.   | 4.87±0.0 | 45.4±4.9                      | 4.9±0.3                          | 20.0±0.4                     | 5.50±0.5                                                  | 22.25±3.                                                  | 1.30±0.0                    | 24.2±1.1a      | 15.4±0.3 |
|                   | a          | 0a         | 3a       | a                             | a                                | a                            | a                                                         | 7a                                                        | 1a                          |                | a        |

546 Values in the table are mean ± standard error. *ST* soil temperature, *SMC* soil moisture, *pH* soil pH, *NO<sub>3</sub><sup>-</sup>-N* soil nitrate  
 547 nitrogen, *NH<sub>4</sub><sup>+</sup>-N* soil ammonia nitrogen, *TN* soil total nitrogen, *DOC* soil dissolved organic carbon, *POC* soil  
 548 particulate organic carbon, *SOC* soil organic carbon, *POC/SOC* ratio of POC to SOC, *SOC/TN* ratio of SOC to TN.  
 549 Different lowercase letters represented significant difference between **None** and **Understory** treatments ( $P < 0.05$ ).

550 Data was the average of April, July and November data.  $N=18$ ,  $n=3$ . The same below

551

552

553

554

555

556

557

558

559

560

561

562

563

564

565

566

567

568

569

570



571 Table A1 Soil enzymes and their corresponding substrates and functions

| Enzyme                               | E. C     | Abbreviation | Substrate                                | Function                                                                                                                                   |
|--------------------------------------|----------|--------------|------------------------------------------|--------------------------------------------------------------------------------------------------------------------------------------------|
| Peroxidase                           | 1.11.1.7 | PER          | L-DOPA                                   | Oxidize lignin and aromatic compounds using H <sub>2</sub> O <sub>2</sub> or secondary oxidants as an electron acceptor (Sinsabaugh 2010). |
| Phenol oxidase                       | 1.10.3.2 | PPO          | L-DOPA                                   | Oxidize phenolic compounds using oxygen as an electron acceptor (Sinsabaugh 2010).                                                         |
| $\alpha$ -1,4-glucosidase            | 3.2.1.20 | $\alpha$ G   | 4-MUB- $\alpha$ -D-glucoside             | Releases glucose from starch (Stone et al. 2014).                                                                                          |
| $\beta$ -1,4-glucosidase             | 3.2.1.21 | $\beta$ G    | 4-MUB- $\beta$ -D-glucoside              | Releases glucose from cellulose (Stone et al. 2014).                                                                                       |
| $\beta$ -1,4-xylosidase              | 3.2.1.37 | $\beta$ X    | 4-MUB- $\beta$ -D-xyloside               | Releases xylose from hemicellulose (Stone et al. 2014).                                                                                    |
| $\beta$ -1,4-N-acetylglucosaminidase | 3.2.1.14 | NAG          | 4-MUB-N-acetyl- $\beta$ -D-glucosaminide | Releases N-acetyl glucosamine from oligosaccharides (Stone et al. 2014).                                                                   |
| Acid phosphatase                     | 3.1.3.1  | AP           | 4-MUB-phosphate                          | Releases phosphate groups (Stone et al. 2014).                                                                                             |

572

573

574

575

576

577

578

579

580

581

582

583

584

585

586

587

588

589

590

591



592 Table A2 Pearson correlation analysis of soil environmental factors and different microbial biomass and enzyme

593 activities

| Environmental factors |                                | ST     | SMC     | pH     | NO <sub>3</sub> -N | NH <sub>4</sub> <sup>+</sup> -N | TN     | DOC    | POC   | SOC    | POC/SOC | SOC/TN |
|-----------------------|--------------------------------|--------|---------|--------|--------------------|---------------------------------|--------|--------|-------|--------|---------|--------|
| PLFAs                 | G <sup>+</sup>                 | 0.77** | -0.45   | -0.38  | 0.72**             | 0.28                            | 0.11   | 0.24   | 0.06  | 0.26   | -0.13   | 0.39   |
|                       | G <sup>-</sup>                 | -0.05  | 0.15    | -0.01  | 0.18               | 0.38                            | 0.70** | 0.27   | 0.52* | 0.68** | 0.33    | 0.29   |
|                       | Bacteria                       | 0.44   | -0.24   | -0.25  | 0.58*              | 0.62**                          | 0.53*  | 0.57*  | 0.48* | 0.65** | 0.27    | 0.46   |
|                       | Fungi                          | 0.11   | -0.02   | -0.20  | 0.40               | 0.43                            | 0.68** | 0.39   | 0.56* | 0.72** | 0.38    | 0.36   |
|                       | Actinomycetes                  | 0.65** | -0.67** | -0.13  | 0.69**             | 0.69**                          | 0.22   | 0.63** | 0.08  | 0.36   | -0.14   | 0.37   |
|                       | PLFAs                          | 0.54*  | -0.37   | -0.26  | 0.69**             | 0.63**                          | 0.47*  | 0.60** | 0.41  | 0.58*  | 0.20    | 0.43   |
|                       | G <sup>+</sup> /G <sup>-</sup> | 0.88** | -0.57*  | -0.40  | 0.71**             | 0.14                            | -0.17  | 0.18   | -0.17 | -0.02  | -0.29   | 0.25   |
| Enzymes               | F/B                            | -0.50* | 0.22    | -0.01  | -0.30              | -0.17                           | -0.07  | -0.15  | 0.03  | -0.18  | 0.22    | -0.24  |
|                       | αG                             | 0.40   | -0.54*  | -0.30  | 0.51*              | 0.64**                          | 0.30   | 0.69** | 0.23  | 0.45   | 0.04    | 0.44   |
|                       | βG                             | 0.57*  | -0.41   | -0.40  | 0.67**             | 0.50*                           | 0.38   | 0.42   | 0.16  | 0.37   | -0.03   | 0.22   |
|                       | βX                             | 0.54*  | -0.30   | -0.40  | 0.64**             | 0.32                            | 0.36   | 0.23   | 0.25  | 0.32   | 0.11    | 0.15   |
|                       | NAG                            | 0.30   | -0.06   | -0.49* | 0.30               | -0.46                           | -0.06  | -0.52* | -0.38 | -0.34  | -0.38   | -0.43  |
|                       | AP                             | 0.28   | 0.00    | -0.16  | 0.09               | -0.44                           | -0.21  | -0.48* | -0.36 | -0.38  | -0.32   | -0.33  |
|                       | PPO                            | 0.86** | -0.57*  | -0.33  | 0.72**             | 0.25                            | -0.01  | 0.23   | -0.13 | 0.05   | -0.28   | 0.14   |
| PER                   | 0.81**                         | -0.54* | -0.12   | 0.61** | 0.37               | -0.01                           | 0.32   | -0.03  | 0.13  | -0.18  | 0.23    |        |

594 Values are *r* value of Pearson correlation analysis. \* indicates a significant difference at  $P < 0.05$ ; \*\* indicates a  
 595 significant difference at  $P < 0.01$ . G<sup>+</sup> gram positive bacteria, G<sup>-</sup> gram negative bacteria, PLFAs total PLFAs, G<sup>+</sup>/G<sup>-</sup>  
 596 ratio of G<sup>+</sup> to G<sup>-</sup>, F/B ratio of fungi to bacteria. αG α-1,4-glucosidase, βG β-1,4-glucosidase, NAG  
 597 β-1,4-N-acetylglucosaminidase, βX β-1,4-xylosidase, AP acid phosphatase, PPO phenol oxidase, PER peroxidase. The  
 598 same below

599

600

601

602

603

604

605

606

607

608

609



610 Table A3 Pearson correlation analysis of soil different microbial biomass and enzyme activities

| Factors | G <sup>+</sup> | G <sup>-</sup> | Bacteria | Fungi  | Actinomycetes | PLFAs  | G <sup>+</sup> /G <sup>-</sup> | F/B   |
|---------|----------------|----------------|----------|--------|---------------|--------|--------------------------------|-------|
| αG      | 0.29           | 0.46           | 0.53*    | 0.51*  | 0.61**        | 0.48*  | 0.12                           | -0.17 |
| βG      | 0.67**         | 0.57*          | 0.83**   | 0.65** | 0.70**        | 0.83** | 0.52*                          | -0.27 |
| βX      | 0.71**         | 0.46           | 0.73**   | 0.58*  | 0.47          | 0.73** | 0.60**                         | -0.28 |
| NAG     | 0.40           | -0.15          | 0.01     | 0.02   | -0.11         | 0.02   | 0.52*                          | -0.02 |
| AP      | 0.32           | -0.24          | 0.03     | -0.14  | -0.15         | 0.08   | 0.49*                          | -0.07 |
| PPO     | 0.84**         | 0.09           | 0.57*    | 0.28   | 0.46          | 0.64** | 0.91**                         | -0.44 |
| PER     | 0.79**         | 0.04           | 0.55*    | 0.21   | 0.47*         | 0.62** | 0.86**                         | -0.46 |

611

612

613

614

615

616

617

618

619

620

621

622

623

624

625

626

627

628

629

630

631

632





633 Table A4 Soil environmental factors in different months

| Treatment  | Time     | ST<br>(°C) | SWC<br>(%) | pH       | NO <sub>3</sub> <sup>-</sup> -N<br>(mg<br>kg <sup>-1</sup> ) | NH <sub>4</sub> <sup>+</sup> -N<br>(mg kg <sup>-1</sup> ) | TN<br>(g kg <sup>-1</sup> ) | DOC<br>(mg<br>kg <sup>-1</sup> ) | POC<br>(g kg <sup>-1</sup> ) | SOC<br>(g kg <sup>-1</sup> ) | POC/SO<br>C<br>(%) | SOC/TN   |
|------------|----------|------------|------------|----------|--------------------------------------------------------------|-----------------------------------------------------------|-----------------------------|----------------------------------|------------------------------|------------------------------|--------------------|----------|
| None       | April    | 18.9±0.    | 22.8±0.    | 4.88±0.0 | 4.9±0.8                                                      | 23.1±1.8                                                  | 1.29±0.                     | 45.9±3.                          | 4.36±0.6                     | 19.7±1.7                     | 21.9±1.5           | 15.3±0.8 |
|            |          | 3aA        | 5aA        | 4aA      | aA                                                           | bA                                                        | 08aA                        | 5bA                              | 3aA                          | aA                           | aA                 | aA       |
|            | July     | 28.1±0.    | 18.8±0.    | 4.80±0.0 | 6.5±0.4                                                      | 14.6±0.4                                                  | 1.13±0.                     | 40.5±3.                          | 3.03±0.3                     | 16.9±0.7                     | 18.1±2.2           | 15.4±0.9 |
|            |          | 2aA        | 5aB        | 4aA      | aA                                                           | bB                                                        | 06aA                        | 6bA                              | 7aA                          | aA                           | bA                 | aA       |
|            | November | 16.4±0.    | 24.1±1.    | 4.95±0.0 | 3.1±0.3                                                      | 6.4±0.4a                                                  | 1.16±0.                     | 25.6±0.                          | 3.55±0.0                     | 16.3±0.3                     | 21.8±0.4           | 14.0±0.6 |
|            |          | 2aC        | 0bA        | 4aA      | aB                                                           | C                                                         | 03aA                        | 2bA                              | 3bA                          | bA                           | aA                 | aA       |
| Understory | April    | 18.8±0.    | 22.6±0.    | 4.89±0.0 | 4.9±0.7                                                      | 29.8±2.1                                                  | 1.29±0.                     | 57.3±4.                          | 5.17±0.4                     | 20.3±0.9                     | 25.6±1.5           | 15.8±0.7 |
|            |          | 0aB        | 6aB        | 7aA      | aB                                                           | aA                                                        | 00aA                        | 0aA                              | 3aA                          | aA                           | aA                 | aA       |
|            | July     | 27.6±0.    | 19.9±0.    | 4.86±0.0 | 7.1±0.4                                                      | 29.24±0.                                                  | 1.29±0.                     | 51.4±5.                          | 4.48±0.8                     | 19.9±1.2                     | 22.1±2.9           | 15.4±0.7 |
|            |          | 2bA        | 4aC        | 7aA      | aA                                                           | 8aA                                                       | 03aA                        | 0aA                              | 4aA                          | aA                           | aA                 | aA       |
|            | November | 16.5±0.    | 26.3±0.    | 4.86±0.0 | 4.5±0.3                                                      | 7.8±0.2a                                                  | 1.32±0.                     | 27.5±0.                          | 4.93±0.2                     | 19.7±0.3                     | 24.9±1.0           | 15.0±0.3 |
|            |          | 2aC        | 9aA        | 4aA      | aB                                                           | B                                                         | 01aA                        | 2aA                              | 8aA                          | aA                           | aA                 | aA       |

634 Different lowercase letters represented significant difference between different treatments, and different uppercase  
 635 letters represented significant difference among different months in the same treatment ( $P < 0.05$ ). The same below

636

637

638

639

640

641

642

643

644

645

646

647

648

649

650

651



652 Table A5 Soil microbial biomass in different months

| Treatment  | Time     | G <sup>+</sup><br>(nmol g <sup>-1</sup> ) | G <sup>-</sup><br>(nmol<br>g <sup>-1</sup> ) | Bacteria<br>(nmol g <sup>-1</sup> ) | Fungi<br>(nmol g <sup>-1</sup> ) | Actinomycetes<br>(nmol g <sup>-1</sup> ) | PLFAs<br>(nmol g <sup>-1</sup> ) | G+/G-    | F/B      |
|------------|----------|-------------------------------------------|----------------------------------------------|-------------------------------------|----------------------------------|------------------------------------------|----------------------------------|----------|----------|
| None       | April    | 4.25±0.44                                 | 4.61±0.5                                     | 8.86±0.94a                          | 2.07±0.30a                       | 2.10±0.22aA                              | 11.56±0.75                       | 0.93±0.0 | 0.21±0.0 |
|            |          | aB                                        | 0aA                                          | A                                   | A                                |                                          | bA                               | 1aB      | 1aAB     |
|            | July     | 6.28±0.47                                 | 3.62±0.0                                     | 9.31±0.13b                          | 1.89±0.03b                       | 2.09±0.22aA                              | 13.29±0.30                       | 1.59±0.0 | 0.20±0.0 |
|            |          | aA                                        | 8aAB                                         | A                                   | A                                |                                          | aA                               | 7aA      | 0aB      |
|            | November | 2.82±0.34                                 | 3.11±0.2                                     | 5.93±0.56b                          | 1.45±0.07b                       | 0.817±0.41aB                             | 8.19±0.52b                       | 0.90±0.0 | 0.25±0.0 |
|            |          | bB                                        | 2aB                                          | B                                   | A                                |                                          | B                                | 5aB      | 2aA      |
| Understory | April    | 3.81±0.46                                 | 4.32±0.2                                     | 10.53±0.54                          | 2.21±0.08a                       | 2.05±0.06aAB                             | 14.62±0.50                       | 0.89±0.0 | 0.26±0.0 |
|            |          | aC                                        | 1aA                                          | aA                                  | A                                |                                          | aAB                              | 5aB      | 4aA      |
|            | July     | 7.22±0.25                                 | 4.52±0.2                                     | 11.76±0.51                          | 2.23±0.04a                       | 2.99±0.36aA                              | 16.67±0.71                       | 1.62±0.0 | 0.19±0.0 |
|            |          | aA                                        | 9aA                                          | aA                                  | A                                |                                          | aA                               | 4aA      | 1aA      |
|            | November | 5.41±0.51                                 | 4.92±0.2                                     | 10.32±0.59                          | 2.35±0.21a                       | 1.23±0.55aB                              | 13.90±0.98                       | 1.13±0.1 | 0.23±0.0 |
|            |          | aB                                        | 8aA                                          | aA                                  | A                                |                                          | aB                               | 5aB      | 3aA      |

653

654

655

656

657

658

659

660

661

662

663

664

665

666

667

668

669

670



671 Table A6 Soil enzyme activities in different months

| Treatment  | Time     | $\alpha$ G<br>(nmol g <sup>-1</sup> h <sup>-1</sup> ) | $\beta$ G<br>(nmol g <sup>-1</sup> h <sup>-1</sup> ) | $\beta$ X<br>(nmol g <sup>-1</sup> h <sup>-1</sup> ) | NAG<br>(nmol g <sup>-1</sup> h <sup>-1</sup> ) | AP<br>(nmol g <sup>-1</sup> h <sup>-1</sup> ) | PPO<br>(nmol g <sup>-1</sup> h <sup>-1</sup> ) | PER<br>(nmol g <sup>-1</sup> h <sup>-1</sup> ) |
|------------|----------|-------------------------------------------------------|------------------------------------------------------|------------------------------------------------------|------------------------------------------------|-----------------------------------------------|------------------------------------------------|------------------------------------------------|
| None       | April    | 3.93±0.41aA                                           | 61.9±4.3aAB                                          | 24.8±0.2aB                                           | 24.9±3.2aA                                     | 300.5±22.9aB                                  | 0.18±0.02aB                                    | 0.40±0.03bB                                    |
|            | July     | 3.74±0.09aA                                           | 66.7±1.3aA                                           | 33.6±2.7aA                                           | 29.3±3.1bA                                     | 711.9±79.8aA                                  | 0.41±0.02aA                                    | 0.69±0.03bA                                    |
|            | November | 2.48±0.12aB                                           | 52.8±2.1aB                                           | 30.5±1.7aAB                                          | 22.8±2.0bA                                     | 698.63±70.3aA                                 | 0.20±0.03aB                                    | 0.47±0.02aB                                    |
| Understory | April    | 3.72±0.15aA                                           | 65.9±3.9aA                                           | 21.3±5.8aA                                           | 26.8±3.1aB                                     | 492.4±48.8aB                                  | 0.24±0.01aC                                    | 0.52±0.03aB                                    |
|            | July     | 3.35±0.19aAB                                          | 75.8±6.1aA                                           | 33.3±1.8aA                                           | 41.6±2.1aA                                     | 699.5±47.8aA                                  | 0.48±0.01aA                                    | 0.89±0.04aA                                    |
|            | November | 2.90±0.12aB                                           | 65.7±2.3aA                                           | 33.8±2.8aA                                           | 32.6±1.6aB                                     | 689.32±35.1aA                                 | 0.28±0.01aB                                    | 0.53±0.04aB                                    |

672
